# Supplementary material for: Effect of a Mobile Monitoring System vs Usual Care on Depression Symptoms and Psychological Health: A Randomized Clinical Trial
Source: PubMed Central journal article supplement — JAMA Netw Open. 2020 Jan 17;3(1):e1919403. doi: 10.1001/jamanetworkopen.2019.19403 (PMC6991269; doi:10.1001/jamanetworkopen.2019.19403), 2020-01-17
Supplement: jamanetwopen-3-e1919403-s001.pdf [file jamanetwopen-3-e1919403-s001.pdf]

**PARTNERS HUMAN RESEARCH COMMITTEE  
PROTOCOL SUMMARY**

1  
2     **Answer all questions accurately and completely in order to provide the PHRC with the relevant**  
3     **information to assess the risk-benefit ratio for the study. Do not leave sections blank.**  
4

5     **PRINCIPAL/OVERALL INVESTIGATOR**

6     David K Ahern, Ph.D

7  
8     **PROTOCOL TITLE**

9     Dashboards for Clinician Monitoring of Patients through a Mobile Sensing  
10     Platform

11  
12  
13     **FUNDING**

14     Cogito Corporation

15  
16  
17     **VERSION DATE**

18     12/01/2016

19  
20  
21     **SPECIFIC AIMS**

22     Concisely state the objectives of the study and the hypothesis being tested.

23     The primary objective of this project is to evaluate and validate the use of Cogito's  
24     mobile sensing platform in an advanced Patient-Centered Medical Home (PCMH) with  
25     co-located behavioral health services. The Cogito mobile platform is innovative in  
26     providing mobile-enabled, scalable, noninvasive tools for detecting and monitoring  
27     behavioral health problems across populations. The platform and associated mobile  
28     application allow mobile phones to passively and securely gather behavioral data that  
29     relates to mental health clinical assessment criteria, run these data through  
30     computational models validated against standardized mental health assessments, and  
31     provide transparent feedback in both a patient-facing mobile dashboard and a clinician-  
32     facing clinical/population health dashboard. The platform enriches the types of  
33     behavioral health data that can be collected by patients and the dashboard component  
34     allows for flexible, privacy-preserving utilization.

35     We propose to validate the efficacy of the mobile sensing platform through a 2-arm,  
36     randomized controlled study comparing the intervention with a control group. We  
37     hypothesize that the two groups will differ across six outcome domains. Cogito plans to  
38     evaluate specifically and objectively how the platform can (1) enhance provider  
39     workflows, (2) improve patient treatment outcomes, (3) raise patient engagement, (4)  
40     increase patient self-help behavior, (5) improve population health management and  
41     research, and (6) moderate the upward trend in the total cost of care. We will use  
42     quantified metrics of each of these outcomes, measured at the beginning and end of the  
43     study, in order to compare differences between the intervention and control group.

46 **BACKGROUND AND SIGNIFICANCE**

47 Provide a brief paragraph summarizing prior experience important for understanding the  
48 proposed study and procedures.

49 Behavioral health programs are highly effective for patients who receive care  
50 consistently (Katon et al, 2010). However, currently, the state of the art care cannot  
51 provide clinicians with any objective information on patient health status in between  
52 clinical visits. Clinicians can not strategize, plan, or triage patients based on what  
53 happens outside of the clinic. The only means that clinicians have to gather information  
54 on patients who are not in the clinic is via arduous phone calls or mailed survey  
55 responses. When clinicians need to reach patients who are not in the clinic, these  
56 patient self ratings have been widely favored as a way of tracking one's mood in daily  
57 life. The underlying rationale is that early detection of emerging symptoms can lead to  
58 pre-emptive action (Selby et al, 2008). For example, if worsening of depressive  
59 symptoms is detected early, patient and provider can initiate steps to prevent relapse  
60 (Valderas et al, 2008). However, unfortunately, in daily life, patients use active mood  
61 monitoring at best inconsistently, or not at all. Patient self-ratings often do not match a  
62 clinician's assessment of the patient, thus providing the clinician with potentially biased  
63 point in time information upon which to make critical clinical decisions (Takayanagi et al,  
64 2014). Therefore, as a means for detecting the deterioration of mental and behavioral  
65 health early in the service of early intervention, self-reported mood ratings are  
66 suboptimal.

67 Due to this urgent need, Cogito has developed a mobile sensing platform and partnered  
68 with the South Huntington Clinic, Brigham and Women's Primary Care Associates of  
69 Brookline and the BWH Department of Psychiatry. Mobile health interventions have  
70 been shown to be effective (Donker et al, 2013; Harrison et al, 2011). The Cogito mobile  
71 sensing platform is unique in providing mobile-enabled, scalable, noninvasive tools for  
72 detecting and monitoring behavioral health problems in many populations. From the rich  
73 data streams provided by the platform, Cogito delivers a system of passive behavioral  
74 monitoring, including a phone application that gathers data, stores and transfers the  
75 data securely, and provides feedback on a patient mobile dashboard. In addition, the  
76 platform includes a clinical dashboard that displays both individual and aggregate level  
77 patient information. This efficacy study will determine the value, for clinicians, patients,  
78 and researchers, of using the Cogito system in an integrated PCMH.

79 Cogito has previously completed an IRB approved field trial of this technology, as part  
80 of a Department of Defense (DOD) Defense Advanced Research Program Agency  
81 (DARPA) contract, to build tools to objectively identify the early stage warning signs of  
82 major mental health issues. This three-month 100-participant trial validated both the  
83 technical infrastructure and the data security protocol, and provided valuable feedback  
84 on how to correctly design mobile phone technology intervention protocols that provide  
85 the least amount of risk and greatest benefit to the participants. Participants rated the  
86 application as emotionally supportive and the process of leaving audio diaries as  
87 helpful, even though no feedback was given. Participants were comfortable with the  
88 security and privacy aspects of the technology (Place et al, 2013).  
89

90 **RESEARCH DESIGN AND METHODS**

91 Briefly describe study design and anticipated enrollment, i.e., number of subjects to be enrolled  
92 by researchers study-wide and by Partners researchers. Provide a brief summary of the  
93 eligibility criteria (for example, age range, gender, medical condition). Include any local site  
94 restrictions, for example, “Enrollment at Partners will be limited to adults although the sponsor’s  
95 protocol is open to both children and adults.”

96 This project is designed to research the effect of a novel technology on a sample of  
97 behavioral health patients. The study design is a two-arm clinical trial with 1:1  
98 randomization. It is a single site study. The clinics are within the Partners network.  
99 Given results from previous behavioral research involving technology interventions  
100 (Quinn et al 2011; Titov 2011), and our own unpublished data using the Mobile Sensing  
101 Platform in DARPA clinical trials, we expect effect sizes (cohen’s d) of outcome  
102 changes in the .35-.80 range. We will measure change both within-subjects over the  
103 course of the trial, and between-subjects in the control and treatment group. Using  
104 conservative estimates, a minimum cohen’s d = .35 and a needed power of .75, with a  
105 two-tailed independent group t-test, we estimate sample sizes per group to be 115 to  
106 achieve an alpha of .05. We will recruit 150 participants per group (300 total) to account  
107 for retention and potential data validity issues.

108 One arm, the experimental group, will receive the technology intervention in addition to  
109 standard treatment, while the other arm, the control group, will receive standard  
110 treatment only. Potential study participants will be assigned to the experimental or  
111 control group by coin-flip randomization.

112 The study will be open to patients with varying mental health and physical diagnoses  
113 and treatment programs. Patients with either an iPhone or Android smartphone will be  
114 eligible to participate in the research study. Patients with an Android smartphone  
115 randomized to the experimental group will receive a patient mobile phone application  
116 that gathers data passively from the participants’ phones. The mobile application is  
117 installed and activated on the participants’ phones by study staff. Patients with an  
118 iPhone smartphone randomized to the experimental group will receive a patient mobile  
119 phone application that does not gather data passively from the participants’ phone.  
120 Participants with an iPhone will receive a version of the app that collects data and  
121 provides feedback on mood. Patients with iPhone and Android smartphone will not be  
122 separated out by phone type when determining randomization to experimental or control  
123 group. Patients with iPhone or Android will be equally likely to be randomized to the  
124 experimental or control group. During the study period, participants in the experimental  
125 group will receive feedback on their mobile device, while their corresponding clinicians  
126 will receive comparable feedback via the clinical dashboard. The metrics presented as  
127 feedback are calculated by analyzing the sensor data that is built into current generation  
128 mobile phones. Patients receive daily feedback, which falls under four categories:  
129 mood, sleep, social activity, and physical activity. Patients with an iPhone will receive  
130 feedback on mood only. Clinicians receive the same information for a panel of patients  
131 they treat. Users of the system can view feedback both historically and in real time.  
132 More details on the feedback system are provided in Section 3.3.

133 Patients in the control group will receive no mobile phone application. Neither iPhone  
134 nor Android smartphone users randomized to the control group will receive the mobile  
135 phone application. The treating clinicians for these patients will not receive any  
136 feedback on their behaviors in the clinical dashboard.

137 For all patients, the study period lasts 6 months per participant. At the end of the study  
138 period the mobile application will be removed from the participant's phone. For all  
139 participants in both groups, outcome metrics will be gathered at the conclusion of the  
140 study. These outcomes measures will be analyzed for differences between the control  
141 and experimental group.

142 All patients will continue to receive behavioral health programming, irrespective to  
143 participation in this study. Treatment at the high standard of Partners Healthcare will be  
144 provided to all participants. There will be no designated changes made to that treatment  
145 as part of this protocol. No systems will be integrated in any way into existing behavioral  
146 health or medical record technology. Treatment is not contingent on participation.

### 147 **3.1 Inclusion Criteria:**

148 1) Must be a patient at the South Huntington or Brookline Clinics (See Before  
149 Study Enrollment Section).

150 2) Must be between ages 18-75.

151 3) Must be receiving direct care or care management within Behavioral Health.

152 4) Must have a smartphone with voice and data plan as their primary phone.

153 5) The smartphone must meet study requirements. Current requirement is  
154 Android OS Version 4.0.0 or newer or iOS version 9.0.0 or newer.

155 6) Must speak and read conversational English or Spanish.

156 7) Must report that he/she is the primary user of the phone, meaning he/she is  
157 the sole user 90% of time the phone is in use.

### 158 **3.2 Exclusion Criteria:**

159 1) Active primary psychotic disorder.

160 2) Cognitive impairment that would impede adherence to study procedures, or  
161 ability to provide informed consent.

162 3) Acute suicide or homicide risk as defined by best practice clinical judgement.

163 4) Terminal illness as diagnosed by physician, with prognosis of survival of less  
164 than 12 months.  
165  
166

167 Briefly describe study procedures. Include any local site restrictions, for example, “Subjects  
168 enrolled at Partners will not participate in the pharmacokinetic portion of the study.” Describe  
169 study endpoints.  
170

171

## 172 **Before Study Enrollment:**

173 The two clinics for the study are the Brigham and Women’s Advanced Primary Care  
174 Associates, South Huntington Clinic and Brigham and Women’s Primary Care  
175 Associates of Brookline. Patients, both existing and new to the behavioral health  
176 program will be referred to the study by their clinical social worker. Only patients that  
177 have been cleared by social workers for safety risk will be allowed to enroll in the study.  
178 To clear a patient, social workers will use clinical judgement to determine if the patient  
179 poses an imminent safety risk. If the clinician does not have enough information to  
180 make an informed decision about safety, he or she will reach out to the patient in order  
181 to better assess current risk. No patient will be contacted by study staff until a Social  
182 Worker has cleared the patient as not an imminent safety risk. Once a patient has been  
183 cleared, they will be asked to answer a brief series of screening questions.  
184

185 These questions will be limited to the compatibility of the patient’s phone and service  
186 plan, as listed in the inclusion criteria above, and will not be clinical in nature. All  
187 patients will be provided with printed information about the study and time to ask the  
188 recruiting staff any questions that may arise about any aspect of the study. A  
189 recruitment brochure and study description are attached to this application. Informed  
190 consent and administration of self-report measures can occur in one of two ways. First,  
191 a member of the research team can take informed consent face-to-face on site.  
192 Consent could happen immediately or could be scheduled for a later date; the  
193 consenting period will not be restricted to 12 hours or less from time of recruitment.  
194

195 Second, research staff can take informed consent by phone. After a potential participant  
196 has received clinician approval and expressed interest in the study, s/he may be given a  
197 copy of our current IRB-approved brochures about the study and/or a brief in-person  
198 overview (5 minutes) with the research assistant. The patient will have the chance to  
199 ask the research assistant any questions. If s/he remains interested, s/he can take the  
200 Consent Form home for review and schedule a 5-10 minute phone call with research  
201 staff within the next week.  
202

203 In this call, research staff can answer any questions on the Consent Form or about the  
204 study. If the patient agrees to participate, s/he can sign the form and return the  
205 signature sheet to study staff either as a hard copy or as a scanned copy through email.  
206 Research staff will then sign the copy and send the participant a final copy of the  
207 Consent Form with both signatures. The participant may decide not to participate at any  
208 time after taking the Consent Form home or at any time during the study.  
209

210 A second phone call or an in-person visit will be scheduled with research staff after a  
211 signed copy of the participants consent form is received, to administer the self-report  
212 measures to the patient and instruct them on usage of the mobile application. If the  
213 participant scores positively on the last item on the Patient Health Questionnaire,  
214 research staff will page the patient's social worker. The Social Worker and patient will  
215 talk privately in a separate room or call. Once the Social Worker has cleared the patient,  
216 s/he will call research staff to notify them. Research staff will then call the patient back  
217 and commence the enrollment process.

218 The control group has completed their enrollment at this time. For the experimental  
219 group, research staff will help to install the mobile application on the participant's phone.  
220 Research staff will also train participants in usage of the mobile application. This can be  
221 done in person or by phone.

222 All participants will receive a document that includes study contact information. This  
223 document will allow participants to reach out with any questions during the course of the  
224 study. All participants will remain in the study for 6 months but can withdraw from the  
225 study at any time. Withdrawal will have no effect on behavioral health treatment. At the  
226 end of the study, outcome data will be obtained from records. Participants will continue  
227 with behavioral health programming irrespective of participation in the study.

228 All patients receiving behavioral health care or care management at the South  
229 Huntington Clinic are assigned to one of three provider teams. Each provider team is  
230 composed of at least one social worker, referred to as clinicians. The Brookline Clinic  
231 has one full-time social worker for all patients receiving behavioral health care or care  
232 management.

### 233 **During Study Enrollment:**

234 During the course of the study, participants in the experimental group will have the  
235 research application installed on their mobile phone. For participants with an Android  
236 smartphone, the application on the participants' phones will be recording data about  
237 their behavior. These data will include:

- 238 1. The application will use a combination of GPS, WIFI, and cell tower data to  
239 record the participant's approximate location.
- 240 2. The application will record when the participant makes and receives phone calls,  
241 and the length of those calls. It will create anonymous numbers to represent the  
242 phone numbers of the people the participant calls. These anonymous numbers  
243 will be the same for each phone number, such that the system can tell if the  
244 participant communicates with the same number repeatedly, but it cannot tell  
245 what the actual phone number is. This application will not record the actual  
246 phone numbers or what is said in any calls.

- 247 3. The application will record when the participant sends and gets SMS/MMS  
248 (texts). It will create anonymous numbers to represent the phone numbers of the  
249 people the participant texts with. These anonymous numbers will be the same for  
250 each phone number, such that the system can tell if the participant  
251 communicates with the same number repeatedly, but it cannot tell what the  
252 actual phone number is. The application will not record the actual phone  
253 numbers or what any SMS/MMS says.
- 254 4. The application will record how a participant uses the mobile application including  
255 how frequently it is used and which features of the application the participant  
256 chooses to view or click. These usage logs will have no impact on the  
257 participant's standard of care or compensation.  
258

259 The application will never record participants' names, the names of people in their  
260 contact list, any phone numbers, what is said in phone calls, what is said in SMS/MMS,  
261 or any details on any other applications that are used on their phone, including but not  
262 limited to email, web browsing, Facebook, financial management applications, or any  
263 medical or mental health applications. The mobile application is standalone. It does not  
264 interact with EHR in any way. It does not send data to EHR. It does not receive data  
265 from EHR.  
266

267 The application will also ask the participants to leave audio check-ins. This will be the  
268 only feature currently available on the iPhone version. These audio recordings are free  
269 form single channel audio recordings about how the participant's day is going. They are  
270 stored on the phone and do not use the participant's cell phone plan minutes. Leaving  
271 audio check-ins is optional and voluntary but will be encouraged as part of the research.  
272 Any prompt for audio check-ins can be skipped. Participants are asked to complete  
273 audio check-ins weekly. Participants will be made aware that no member of the  
274 research or care team will hear what is said in these audio check-ins until after the study  
275 is complete.  
276

277 Patients receive mobile feedback on their own behaviors. These behaviors are  
278 calculated via passive mobile sensing. Patients with an iPhone in the experimental  
279 group will only leave audio recordings and receive feedback on mood. While serving as  
280 a contractor to the Defense Advanced Research Program Agency (DARPA), Cogito  
281 gathered an extensive dataset of individual trauma survivors' mobile data. With the goal  
282 of developing mobile phone behavioral health monitoring for military personnel, the  
283 Cogito team ran a 3-month study of 100 participants. The participants, both veteran and  
284 civilian, were enrolled for 12 weeks during which time they each carried a mobile phone  
285 equipped with a research application. The research application passively monitored, on  
286 an intermittent fixed schedule, probe readings from sensors hardwired into the current  
287 generation mobile phone. These sensors included call logs, sms logs, locational pattern  
288 changes, acceleration, and battery levels. During the study, participants also filled out  
289 weekly self-report metrics around mood disorder symptomatology, left weekly "audio  
290 check-in" recordings of themselves speaking, and met with a clinician for a Structured  
291 Clinical Interview DSM-IV-TR (SCID) at both intake and exit dates of the study. This  
292 interview included the Mood Disorders module of the SCID testing paradigm and the

293 PTSD section of the Anxiety Disorders module, providing scored results of symptom  
294 presence and severity for PTSD and depression.  
295

296 Cogito used structured machine learning to create models, which took in as inputs these  
297 raw data streams and predicted the clinical level assessment of symptomatology. Each  
298 model outputs a score from 0 -100, indicating the probability of presence of the  
299 behavioral component of mental health. The model uses a week of data to create a  
300 score, and updates on a daily basis.  
301

302 As a part of the Phase I proof of concept efforts for the current project, Cogito  
303 researchers met with clinical staff, medical directors, and psychiatrists at the South  
304 Huntington Clinic to assess the most useful and actionable means of presenting  
305 feedback to patients.  
306

307 When a patient first opens the mobile application, smiling faces represent the current  
308 health of the user. Each component will have a face indicating the score in the prior  
309 week. These values update automatically on a daily basis so that a patient can, at a  
310 glance, view the state of his or her own well-being. For any category, patients can  
311 choose to explore further for more details. By clicking on the applicable component face  
312 patients will be taken to a new screen with both current and historical information on  
313 their own behaviors.

314 On each component page, the patient will see their current state at the top of the  
315 screen. The patient can look below to see in the last week how their patterns have  
316 changed.

317 Clinicians will provide care and/or care management for both experimental and control  
318 participants.

319 Clinicians have access to a dashboard which tracks and reports patient behavioral  
320 metrics. The clinician dashboard is a composite of the individual dashboards viewable  
321 to each patient, presenting information for a panel of patients. The application is  
322 standalone. It does not interact with EHR in any way. It does not send data to EHR. It  
323 does not receive data from EHR. The application is only accessible from secure  
324 workstations within the clinic.

325 Clinicians can use the dashboard to track continuous changes over time for a group of  
326 patients and view significant changes in behavior since last appointment. This display  
327 would allow clinicians to have insight into the behaviors of their patient population  
328 between appointments, sorted by risk group, treatment, or change in behavior.

329 The data presented in the clinical dashboard are organized into the same components  
330 as the mobile display --mood, sleep, social isolation, and physical isolation.

331 Score indicates the probability of a clinically significant presence of the component. A  
332 higher score indicates a higher probability of presence of the behavior.

333 +/- indicates change, and directionality of change, in score from the previous  
334 appointment.



335 Trend presents a line graph of the score over the previous month. This line graph can  
336 be used to easily understand a continuous pattern of change, including time outside of  
337 the clinic.

338 Clinicians may reference changes in patient's mood, sleep, and social and physical  
339 activity within the progress notes of the patient's medical record.

#### 340 **Completing Study Enrollment:**

341 After 6 months of monitoring, participation in the study is complete. Research staff will  
342 schedule all participants for a final appointment. A second phone call or an in-person  
343 visit will be scheduled to administer survey measures to the patient. Clinical staff will be  
344 made aware of which participants are scheduled to complete the study. In this final  
345 appointment, patients will complete the same self report packet that they did at study  
346 enrollment, and will be provided with a debrief form with information about the study.  
347 Experimental patients will receive an additional exit survey asking about their  
348 experience using the mobile research application. Participants who have previously  
349 completed the study may be later sent a copy of this exit survey.

350  
351 If the patient chooses to complete the study visit by a phone call, research staff will  
352 administer all survey measures over the phone. If the patient scores positively on the  
353 last item on the Patient Health Questionnaire, research staff will page the patient's  
354 Social Worker during the call. The Social Worker and patient will talk privately in a  
355 separate call. Once the Social Worker has cleared the patient, s/he will call research  
356 staff to notify them. Research staff will then call the patient back and commence the  
357 study completion.

358  
359 During this final appointment, the mobile research application will be removed from the  
360 participants' phones, and all the data stored by the application will be deleted from the  
361 participants' phones. **No data recording or tracking as a part of this research will  
362 continue from this point on.** Participants will be compensated for their participation in  
363 the study, as described in Section 4.5 of the detailed protocol. Once all patient-  
364 participants have completed the study, the dashboard will be uninstalled from clinical  
365 workstations.

366  
367  
368 For studies involving treatment or diagnosis, provide information about standard of care at  
369 Partners (e.g., BWH, MGH) and indicate how the study procedures differ from standard care.  
370 Provide information on available alternative treatments, procedures, or methods of diagnosis.  
371 This study will not interfere with any existing treatments or procedures that are available  
372 for the participant's condition. Nor will any aspect of the study provide a diagnosis. The  
373 participant will continue to receive standard behavioral health treatment at South  
374 Huntington or Brookline Clinics, not limited to the duration of the study. Participants in  
375 the control group will experience no changes to their daily lives or to their quality of  
376 care. The participants in the experimental group will receive access to the behavioral  
377 feedback component. The mobile application does not provide advice, treatment,  
378 programming, or diagnosis. The only novel information provided to patients and

379 clinicians are automated markers of behavioral activities (mood, sleep, social activity,  
380 physical activity).

381 In the event a South Huntington clinician should leave the study, leave the practice, or  
382 be otherwise unable to perform the duties outlined in the study's protocol for any  
383 reason, such as illness or vacation, a coverage plan will be enacted. Current clinic  
384 practice designates the social work team to oversee a coverage plan between the pool  
385 of available South Huntington Clinicians. In the event of a staff change or absence,  
386 Social Workers work together to develop a coverage schedule in which the pool of  
387 clinicians collaboratively assumes all responsibilities of the absent clinician. During the  
388 course of the study, these responsibilities will include those outlined in the protocol,  
389 such as responding to alerts should they be issued. Study staff will be made aware of  
390 clinicians' absences daily and will be provided with the contact information for the  
391 covering clinician so that any alerts generated by our system will reach a clinician that is  
392 able to respond, as necessary. Patients will not experience any disruption in care; they  
393 will not be reassigned to other care teams or providers, but will rather be followed by a  
394 covering clinician. In addition, the South Huntington clinicians have designed this  
395 mitigation plan so that each clinician will not be burdened by additional responsibility  
396 even in the unlikely event of a clinician leaving the study. This is the current working  
397 protocol in place. Furthermore, during the study, each clinician will not be assigned  
398 more than approximately one third of the research participants. Out of this one third,  
399 only half (one sixth of the total population) will be in the experimental group and require  
400 anything more than the standard of care at any time.

401 Describe how risks to subjects are minimized, for example, by using procedures which are  
402 consistent with sound research design and which do not unnecessarily expose subjects to risk or  
403 by using procedures already being performed on the subject for diagnostic or treatment purposes.  
404 This study poses minimal risks to the participants. Only patients enrolled in behavioral  
405 health care at the South Huntington or Brookline Clinics are eligible to participate. All  
406 information provided to participants of this study via the mobile application is purely  
407 supplemental to the behavioral health care received at the South Huntington or  
408 Brookline Clinics.

409  
410 Describe explicitly the methods for ensuring the safety of subjects. Provide objective criteria for  
411 removing a subject from the study, for example, objective criteria for worsening disease/lack of  
412 improvement and/or unacceptable adverse events. The inclusion of objective drop criteria is  
413 especially important in studies designed with placebo control groups.

414 Currently, patients in behavioral health are monitored closely for suicidal thoughts,  
415 plans, and behaviors by gold standard safety protocol. In this protocol, participants who  
416 develop active suicidal ideation, represented by a positive score on question 9 of the  
417 PHQ-9 or positive answers on suicidal ideation questions within the Behavioral Health  
418 Assessment and by best practice clinical judgement, will be further assessed by

419 clinicians, and if need be, referred for urgent or emergent clinical assessment. Clinicians  
420 will only approve patients for study participation who are not at imminent risk.

421 Clinicians, with the support of Jane Erb, M.D., Director of Clinical and Educational  
422 Initiatives and Outpatient Services, will review the urgent or emergent safety  
423 assessment and determine if the participant can continue in the study. Any participant  
424 who requires a level of care exceeding customary outpatient services (i.e., psychiatric  
425 hospitalization or participation in a partial hospital program), or who otherwise report or  
426 manifest thoughts or behaviors suggesting possible safety concern due to participation  
427 in the study, will be removed from the study.

428 In addition to the safety monitoring that takes place as part of standard care, study staff  
429 will provide clinicians with notifications about patients of potential concern through a  
430 daily email. This email will be sent through the secure Brigham email system. This email  
431 will be sent each morning (Monday - Friday). Patients will be told that the notification  
432 system is active only during the business week and expectations for emergency  
433 situations will be clearly set. Social Workers will receive this email if a patient  
434 experiences a dramatic change in feedback scores in either the positive or negative  
435 direction, or if a patient has sustained a high score for an extended period of time. The  
436 email will include the number of cases a social worker must review, but no patient  
437 names. Once an email is received, clinicians will review both the clinical dashboard and  
438 the patients' medical record. At this point, the clinician will make a decision about next  
439 steps.

440

#### 441 **FORESEEABLE RISKS AND DISCOMFORTS**

442 Provide a brief description of any foreseeable risks and discomforts to subjects. Include those  
443 related to drugs/devices/procedures being studied and/or administered/performed solely for  
444 research purposes. In addition, include psychosocial risks, and risks related to privacy and  
445 confidentiality. When applicable, describe risks to a developing fetus or nursing infant.

446 **Possible problems or worries of the study:** Answering questions about current  
447 psychological and personal life problems may be uncomfortable or unpleasant for some  
448 people. However, very few additional questions will be asked as part of study  
449 participation.

450 All participants are Brigham and Women's patients and have full access to the standard  
451 of care and clinician availability.

452 Patients may also feel uncomfortable about the knowledge that their behavior is being  
453 recorded by the research application. Patients are free to withdraw from the study and  
454 have the application removed at any time. Previous data suggests that this withdrawal  
455 will be minimal (less than 1% of participants in a prior Cogito mobile monitoring trial).

456 **Possible risks of study:** It is possible that patients in the experimental group could  
457 experience increased distress as a result of thinking of past experiences and current life  
458 issues. Additionally, consistently negative feedback from the research application could  
459 be upsetting to the participant. If a participant feels uncomfortable at any time during the

460 study, he or she can speak with their existing care provider at clinics where the study  
461 takes place or can choose to withdraw from the study at any time. Finally, as part of this  
462 study, there is no change to medication, treatment, care, or access to clinicians, thus  
463 there are minimal risks for enrollment in this study.

#### 464 **EXPECTED BENEFITS**

465 Describe both the expected benefits to individual subjects participating in the research and the  
466 importance of the knowledge that may reasonably be expected to result from the study. Provide  
467 a brief, realistic summary of potential benefits to subjects, for example, “It is hoped that the  
468 treatment will result in a partial reduction in tumor size in at least 25% of the enrolled subjects.”  
469 Indicate how the results of the study will benefit future patients with the disease/condition being  
470 studied and/or society, e.g., through increased knowledge of human physiology or behavior,  
471 improved safety, or technological advances.

472 For the control group, there are no known benefits other than the satisfaction in  
473 participating in a research study that will benefit others like them.  
474

475 The hypotheses for this research program are that participants in the experimental  
476 group will have reduced treatment times, improved treatment outcomes, better  
477 engagement, and be better able to self manage health issues. Due to the novel nature  
478 of the technology platform, it is difficult to estimate the effect size of outcomes. Cogito’s  
479 previous DARPA-funded field trial of the mobile sensing platform suggested that  
480 participants found great cathartic and personal value in recording audio diaries.  
481 Participants reported the associated benefits of journal keeping. Through allowing  
482 patients in behavioral health access to actionable real-time data on their own behavior,  
483 and through sharing that information with clinicians, Cogito expects that patients will  
484 experience benefits along engagement, self-management, and treatment outcomes.  
485

486 For future patients, if the results support the hypotheses that the technology can  
487 improve clinician workflow and generate new research opportunities, then there is  
488 enormous clinical benefit for patients within and outside the Partners network.  
489

490 Additionally, if the hypotheses are supported, provider networks may experience  
491 reduction in treatment length and emergency room visits, resulting in the potential for  
492 cost saving benefits.  
493

494 Additionally, clinicians are expected to be able to more efficiently triage and attend to  
495 patient needs with the novel information provided via the Cogito sensing platform.  
496

497 Finally, the dataset generated as part of this research study will be able to provide  
498 opportunity for novel population behavioral health research, providing additional  
499 downstream benefit to both researchers and patients.  
500

#### 501 **EQUITABLE SELECTION OF SUBJECTS**

502 The risks and benefits of the research must be fairly distributed among the populations that stand  
503 to benefit from it. No group of persons, for example, men, women, pregnant women, children,  
504 and minorities, should be categorically excluded from the research without a good scientific or

505 ethical reason to do so. Please provide the basis for concluding that the study population is  
506 representative of the population that stands to potentially benefit from this research.

507  
508 This study is designed to test the efficacy of technology developed for an integrated  
509 behavioral health program in a Patient Centered Medical Home for adult behavioral  
510 health patients. All participants will be sampled from this population.

511  
512 When people who do not speak English are excluded from participation in the research, provide  
513 the scientific rationale for doing so. Individuals who do not speak English should not be denied  
514 participation in research simply because it is inconvenient to translate the consent form in  
515 different languages and to have an interpreter present.

516 Given the nature of the population of the clinic, and given the nature of the technology  
517 and the use of the smartphone application, only those who can understand, speak, and  
518 read conversational English or Spanish will be eligible to participate. The vast majority  
519 of patients in the South Huntington Clinic are fluent in at least one of these languages.  
520 The South Huntington team has clinicians who are fluent in both English and Spanish.

521  
522 For guidance, refer to the following Partners policy:

523 Obtaining and Documenting Informed Consent of Subjects who do not Speak English  
524 <http://healthcare.partners.org/phsirb/nonengco.htm>

525

526

527

528

529

## **RECRUITMENT PROCEDURES**

530 Explain in detail the specific methodology that will be used to recruit subjects. Specifically  
531 address how, when, where and by whom subjects will be identified and approached about  
532 participation. Include any specific recruitment methods used to enhance recruitment of women  
533 and minorities.

534

535 All participants will be recruited from the South Huntington and Brookline Clinics, under  
536 the supervision of the clinic's staff. Patients that are existing patients of the clinic as well  
537 as patients that are new to the clinic will be recruited.

538 Existing patients will be reviewed by the clinical team on a weekly basis. Only  
539 established patients within the South Huntington or Brookline Clinics and who have had  
540 a visit within the last twelve months will be considered for the study.

541

542 Once a patient has been identified as a potential participant he or she will be contacted  
543 in a four step process. First, he or she will be sent a recruitment letter providing basic  
544 information about the study and detailing whom to contact for further information. This  
545 letter will also include opt-out information and a prepaid postcard providing patients with  
546 the opportunity to express interest or decline participation in the study. If the patient  
547 does not opt-out within two weeks of receiving the recruitment letter, study staff will

548 attempt to contact the patient by phone or email. The clinician may also reach out to the  
549 patient about the study.

550  
551 If a patient has been identified as a potential participant (review and approval by Social  
552 Worker), the Social Worker may also ask the patient at their appointment if they are  
553 interested in participating in the study. If the patient is interested, the Social Worker will  
554 contact study staff after the appointment and study staff will invite the patient to  
555 complete a screening in the clinic. Alternatively, if the patient is interested in  
556 participating, he or she can tell the front desk, which will page study staff. Study staff will  
557 then invite the patient to complete a screening in the clinic. If the patient does not have  
558 time after their appointment, study staff will follow up with a phone call.

559  
560 We have drafted a short one-page addition to the Behavioral Health packet for patients  
561 to complete if they are interested in learning more about our research study. They will  
562 be asked about the type of phone they use, as well as their contact information and  
563 preferences; if they are eligible, we will follow up with the preferred contact method.

564  
565 We also propose posting about the study on HOPE, a Partners platform connected to  
566 Patient Gateway. Patients can log onto HOPE to learn more about the study and  
567 contact study staff if they are interested in participating. The platform features studies in  
568 the health areas of arthritis, cardiovascular disease, depression, and diabetes; our study  
569 will be included in the depression category.

570  
571 Individuals that are new to the South Huntington or Brookline Clinics will undergo  
572 normal intake processing until it is determined that they are appropriate candidates for  
573 behavioral health treatment-at the South Huntington or Brookline Clinics. During the  
574 initial assessment appointment with a new patient, clinicians will provide eligible patients  
575 with a recruitment letter and study description. Both documents will be available in  
576 English and Spanish. Patients will have the option to speak with study staff in a private  
577 area, leave, or schedule an appointment with study staff for a future appointment.  
578 Spanish translation service will be available.

579 In addition, we will have four advertisements on the available television monitors in the  
580 clinic waiting room. The advertisements will each include one or two sentences  
581 describing the study and invite interested patients to notify the front desk or call study  
582 staff at 617-525-6018.

583 This study does not target any minority groups, and no specific recruitment methods will  
584 be used to enhance the recruitment of women and minorities.

585 Provide details of remuneration, when applicable. Even when subjects may derive medical  
586 benefit from participation, it is often the case that extra hospital visits, meals at the hospital,

587 parking fees or other inconveniences will result in additional out-of-pocket expenses related to  
588 study participation. Investigators may wish to consider providing reimbursement for such  
589 expenses when funding is available

590 Participants will be compensated for participation in the study. Compensation is not  
591 dependent on study group assignment. As suggested by the Partner's Remuneration  
592 Policy, participants will be compensated at a reverse pro rate. Participation in each  
593 month of the study will be compensated at \$20. If participants complete all 6 months of  
594 the study, they will be compensated with a bonus of \$30. Thus, the total possible  
595 compensation for a participant will be \$150. Participants will be paid by check.

596  
597 For guidance, refer to the following Partners policies:

598 Recruitment of Research Subjects

599 <http://healthcare.partners.org/phsirb/recruit.htm>

600

601 Guidelines for Advertisements for Recruiting Subjects

602 <http://healthcare.partners.org/phsirb/advert.htm>

603

604 Remuneration for Research Subjects

605 <http://healthcare.partners.org/phsirb/remun.htm>

606

607

## 608 **CONSENT PROCEDURES**

609 Explain in detail how, when, where, and by whom consent is obtained, and the timing of consent  
610 (i.e., how long subjects will be given to consider participation). For most studies involving more  
611 than minimal risk and all studies involving investigational drugs/devices, a licensed physician  
612 investigator must obtain informed consent. When subjects are to be enrolled from among the  
613 investigators' own patients, describe how the potential for coercion will be avoided.

614 Informed consent and administration of self-report measures can occur in one of two  
615 ways. First, a member of the research team can take informed consent face-to-face on  
616 site. Consent could happen immediately or could be scheduled for a later date; the  
617 consenting period will not be restricted to 12 hours or less from time of recruitment.

618 Second, research staff can take informed consent by phone. After a potential participant  
619 has received clinician approval and expressed interest in the study, s/he can may be  
620 given a copy of our current IRB-approved brochures about the study and/or a brief in-  
621 person overview (5 minutes) with the research assistant. The patient will have the  
622 chance to ask the research staff any questions. If s/he remains interested, s/he can take  
623 the Consent Form home for review and schedule a 5-10 minute phone call with  
624 research staff within the next week to review the consent form.

625 In this call, research staff can answer any questions on the Consent Form or about the  
626 study. If the patient agrees to participate, s/he can sign the form and return the  
627 signature sheet to study staff either as a hard copy or as a scanned copy through email.  
628 Research staff will then sign the copy and send the participant a final copy of the  
629 Consent Form with both signatures. The participant may decide not to participate at any  
630 time after taking the Consent Form home or at any time during the study.

631 Face-to-face informed consent will be obtained on location at the clinic by study staff  
632 after successful recruitment. It will take place in a private space. Consent could happen  
633 immediately or could be scheduled for a later date; the consenting period will not be  
634 restricted to 12 hours or less from time of recruitment. Patients will not be recruited or  
635 consented who are exclusively and only patients of investigators. Only shared patients  
636 of the medical center who are within the behavioral health program will be recruited.  
637 Printed study descriptions will be provided to reduce recruiter coercion.

638 Details about the study, including objectives, procedures, and potential risks and  
639 discomforts will be given in both oral and written form to the participant by the principal  
640 investigator or study staff. Participants will be given the opportunity to ask any questions  
641 and will be given ample time to consider whether they wish to participate. In the event  
642 that any clinical questions arise, patients will be provided with the opportunity to speak  
643 with a social worker co-investigator. They will be informed that refusal to participate will  
644 not interfere with their subsequent medical care.

645 All records of consent will be housed in a locked file cabinet within the office of the  
646 Brigham site lead, Dr. David K. Ahern, located at 1249 Boylston Street, 3rd Floor,  
647 Boston MA 02215.

648  
649 NOTE: When subjects are unable to give consent due to age (minors) or impaired decision-  
650 making capacity, complete the forms for Research Involving Children as Subjects of Research  
651 and/or Research Involving Individuals with Impaired Decision-making Capacity, available on  
652 the New Submissions page on the PHRC website:

653 <http://healthcare.partners.org/phsirb/newapp.htm#Newapp>

654

655 For guidance, refer to the following Partners policy:

656 Informed Consent of Research Subjects

657 <http://healthcare.partners.org/phsirb/infcons.htm>

658

659

660

## 661 **DATA AND SAFETY MONITORING**

662 Describe the plan for monitoring the data to ensure the safety of subjects. The plan should  
663 include a brief description of (1) the safety and/or efficacy data that will be reviewed; (2) the  
664 planned frequency of review; and (3) who will be responsible for this review and for determining  
665 whether the research should be altered or stopped. Include a brief description of any stopping  
666 rules for the study, when appropriate. Depending upon the risk, size and complexity of the  
667 study, the investigator, an expert group, an independent Data and Safety Monitoring Board  
668 (DSMB) or others might be assigned primary responsibility for this monitoring activity.

669

670 NOTE: Regardless of data and safety monitoring plans by the sponsor or others, the principal  
671 investigator is ultimately responsible for protecting the rights, safety, and welfare of subjects  
672 under his/her care.

673 1. Safety and Efficacy Review:



674 All participants are patients within the Partners network, and benefit from all standard of  
675 care, including adverse event reporting and protocol.

676 In addition to the safety monitoring that takes place as part of standard care, staff will  
677 provide clinicians with daily notification about patients of potential concern through an  
678 email. These notifications will be based on the novel signals gathered through the  
679 research mobile application. These signals have not been validated to risk categories.  
680 Notifications are a security provision. In addition, all patients will continue to receive  
681 active best practice risk assessment by BWH clinicians. For this notification process,  
682 clinicians will receive this secure email if a patient experiences a dramatic change in  
683 feedback scores in either the positive or negative direction, or if a patient has sustained  
684 a high score for an extended period of time. Clinicians are responsible for reviewing the  
685 dashboard and patient notes, then making a decision on next steps.

686 1. Planned frequency and responsibility of review:

687 The secure email will be sent daily during the business week. Patients will be made  
688 aware that the notification system is only active during the business week and in the  
689 case of an emergency to follow standard protocol. Clinicians will review its contents  
690 each morning. If there is a notification, clinicians will follow a standard protocol including  
691 risk assessment. This protocol was developed in conjunction with the clinical staff at  
692 South Huntington.

693 The Principal Investigator, David Ahern, PhD, and the co-investigator, Skyler Place,  
694 PhD will meet bi-weekly during enrollment to review participant status with respect to  
695 any safety concerns or risks that emerge during the trial.

696 1. Determining if the research should be altered or stopped:

697 In general terms, a participant will be discontinued from the study for the following  
698 reasons: (1) The participant has experienced an adverse event that, in the opinion of  
699 the principal investigator, requires early termination, (2) The participant becomes a  
700 safety risk due to participation in the study at any time during the trial, (3) The  
701 participant withdraws consent, (4) The participant loses or damages their phone or  
702 loses their service plan to the extent that they are no longer able to adhere to study  
703 procedures.

704  
705

706 Describe the plan to be followed by the Principal Investigator/study staff for review of adverse  
707 events experienced by subjects under his/her care, and when applicable, for review of sponsor  
708 safety reports and DSMB reports. Describe the plan for reporting adverse events to the sponsor  
709 and the Partners' IRB and, when applicable, for submitting sponsor safety reports and DSMB  
710 reports to the Partners' IRBs. When the investigator is also the sponsor of the IND/IDE, include  
711 the plan for reporting of adverse events to the FDA and, when applicable, to investigators at  
712 other sites.  
713

714 NOTE: In addition to the adverse event reporting requirements of the sponsor, the principal  
715 investigator must follow the Partners Human Research Committee guidelines for Adverse Event  
716 Reporting

717 The participants are required to inform the clinical staff or study staff of any side effects  
718 or changes in medical or mental status due to participation in the study. Study staff must  
719 report to the principal investigator any adverse events from this study. All adverse  
720 events will be reviewed and immediately reported to the Partners Human Research  
721 Committee in accordance with ICH guidelines.

722

## 723 **MONITORING AND QUALITY ASSURANCE**

724 Describe the plan to be followed by the principal investigator/study staff to monitor and assure  
725 the validity and integrity of the data and adherence to the IRB-approved protocol. Specify who  
726 will be responsible for monitoring, and the planned frequency of monitoring. For example,  
727 specify who will review the accuracy and completeness of case report form entries, source  
728 documents, and informed consent.

729

730 NOTE: Regardless of monitoring plans by the sponsor or others, the principal investigator is  
731 ultimately responsible for ensuring that the study is conducted at his/her investigative site in  
732 accordance with the IRB-approved protocol, and applicable regulations and requirements of the  
733 IRB.

734 The principal and site investigators will be responsible for insuring the accuracy and  
735 completeness of the consent forms and case report forms.

736 Cogito Corporation will be responsible for monitoring and maintaining the quality of all  
737 data obtained via the research application. The data streams that are gathered from the  
738 participants' phones are passed through several levels of monitoring and quality  
739 assurance. Cogito possesses the capability for automated system deployment and  
740 quality assurance. All of Cogito's system components possess scripted automated QA  
741 tests run at regular intervals. Systems can be recreated using predefined profiles and  
742 tests can be run against the latest versions to ensure quality. Cogito uses a continuous  
743 integration system, Jenkins, which checks out source code nightly and compiles, build,  
744 and runs automated tests. If any code does not pass a test, developers are notified  
745 within a day. Cogito uses Foreman and Puppet systems for automated creation of  
746 system and configuration enforcement. Individual Cogito developers can leverage the  
747 automation capability to deliver software features more quickly and efficiently, ensuring  
748 that they meet acceptable quality.

749 All servers and centralized hardware are locked down both physically and electronically.

750 Centralized secure file servers hold the software code base as well as documentation  
751 and technical reports. Servers are primarily rack mounted in a dedicated storage room.  
752 Virtualization is used to ensure employees have resources they need while maximizing  
753 server capabilities. Networking infrastructure is done through a series of access-  
754 controlled devices, which restrict access of outside presences and protect inside  
755 resources.

756 Datasets are stored on encrypted volumes or under systems with full disk encryption, as  
757 appropriate. Data that are sensitive are locally replicated. Otherwise, data are encrypted  
758 and backed-up externally. Data access is granted under least privilege.

759 Cogito is fully equipped with an internal system for project management and  
760 documentation of non-PII (personally identifiable information) research materials. This  
761 system is fully backed-up and accessible by all employees, both on and off-site. Project  
762 leads maintain its organization to ensure that it is easily readable, providing up to date  
763 information on all existing projects. This wiki system facilitates cross team  
764 communication and planning.

765 Capacity is monitored on a regular basis and infrastructure is designed in such a way  
766 that bringing new capacities is automated within existing system architecture. Cogito  
767 supports off site work locations via shipping of Cogito controlled resources.

768 Cogito offices include a laboratory dedicated to mobile software design, testing, and  
769 validation. They store mobile development phones, development tablets, charging  
770 accessories, and batteries in a locked cabinet accessible only to the appropriate  
771 researchers and engineers. Mobile development phones have been rooted for control  
772 over testing. Laboratory computers are enabled with mobile testing software to  
773 download files containing raw measurements across each mobile dataset. Computers  
774 are equipped to download these data both in real-time and historically, ensuring that  
775 testing can be done both instantaneously and in the field.

776 The computing infrastructure has automated monitoring capacities to alert Cogito  
777 engineering for downtime, data anomalies, security risks, and directed attacks. End  
778 point data will be validated and confirmed by members of the research team.

779 Cogito has secured Federal wide Assurance (FWA) for the Protection of Human  
780 Subjects.

781  
782 For guidance, refer to the following Partners policies:

783 Data and Safety Monitoring Plans and Quality Assurance  
784 <http://healthcare.partners.org/phsirb/guidance.htm#13>

785  
786 Reporting Unanticipated Problems (including Adverse Events)  
787 <http://healthcare.partners.org/phsirb/guidance.htm#7>

788  
789  
790

## 791 **PRIVACY AND CONFIDENTIALITY**

793 Describe methods used to protect the privacy of subjects and maintain confidentiality of data  
794 collected. This typically includes such practices as substituting codes for names and/or medical  
795 record numbers; removing face sheets or other identifiers from completed  
796 surveys/questionnaires; proper disposal of printed computer data; limited access to study data;

797 use of password-protected computer databases; training for research staff on the importance of  
798 confidentiality of data, and storing research records in a secure location.

799

800 NOTE: Additional measures, such as obtaining a Certificate of Confidentiality, should be  
801 considered and are strongly encouraged when the research involves the collection of sensitive  
802 data, such as sexual, criminal or illegal behaviors.

803 The Cogito mobile phone application will gather data on the cell phone. There will be  
804 several layers of security to protect the data. All data on the phone will be stored in  
805 encrypted format within the application directory. Data stored within this directory is only  
806 accessible by the application. Users of the phone and other phone applications will not  
807 be able to access the data stored in this secured directory. In addition, in order to open  
808 the mobile application itself, the user will have a unique username and password.

809 The mobile data itself is inherently identifiable (due to location information and voice  
810 prints), however every effort is made to reduce the amount of personally identifiable  
811 information included. Names will not be used, and phone numbers will be hashed to  
812 create unique identifiers. All participant data will be labeled only by their unique identifier  
813 (UID), assigned to the phone by the research staff at the start of the study. No patient  
814 medical data or name will be stored on the mobile device.

815 All data gathered on the phone, including passive sensor data and audio diaries, will be  
816 automatically and securely transferred in encrypted format. Once the data is  
817 successfully transferred, it will be deleted off of the phone automatically.

818 The data will be transferred to Cogito controlled servers, either in the cloud or at Cogito  
819 headquarters. All servers utilize full disk encryption, to allow for maximum data security.  
820 Data access will be limited to Cogito and BWH study personnel who are listed on this  
821 protocol. All research efforts will take place within the Cogito computing environment or  
822 within Partners; identifiable participant data will not be shared or taken off of Cogito  
823 servers. Access will be limited by secure virtual private network (VPN) connections and  
824 secure shell (SSH) logins to the computing environment. This ensures that when an  
825 authorized member of the study staff accesses the computing environment all traffic  
826 between the client and the server is encrypted.

827 While all data are de-identified using the aforementioned UIDs, patients names must be  
828 displayed on the clinician facing dashboard for efficient and accurate workflow. In order  
829 to ensure the privacy and safety of participants' data, the information needed to link  
830 UIDs to patient's names is only stored within the Cogito platform on the secured Cogito  
831 server. This means that although the clinician dashboard lists the participant's names, it  
832 does not have the information required to link these names to any UID or PII. Cogito's  
833 platform will automatically link and present only the minimum amount of data required  
834 for the clinician dashboard to function.

835 Study staff will create a master list that links participants' names and phone numbers to  
836 UIDs. This list is stored within the database system saved on an encrypted server,  
837 hosted at Cogito. The research staff responsible for recruitment will securely log into the  
838 Cogito platform and enter linking info at time of patient enrollment.

839 Only team members who need the information to perform a specific job will be granted  
840 access to names and phone numbers by the primary investigator as they need it to  
841 complete specific tasks. The list linking UIDs to personal identifiers will be destroyed at  
842 the completion of data collection and transcription.

843 Both the patient facing mobile application and the clinician facing dashboard have the  
844 added benefit of not storing any data from the Cogito servers. Both sides of the software  
845 are merely 'viewers' of the feedback data on Cogito servers and do not permanently  
846 store these data.

847 The paper self-report measures gathered at intake and outtake will be labeled only by  
848 UID. They will not be linked to participant name.

849 All measures will be kept indefinitely after the study is closed. The study staff as well as  
850 the overseeing IRB and specific governmental overseeing bodies may access study  
851 records. Beyond these bodies, access to identifiable data will not be granted to any  
852 other entity.

853 De-identified data, such as summary statistics, prediction model outputs, and averaged  
854 measures of mental health and behavior may be shared with other researchers,  
855 companies and government organizations. These data will meet the HIPAA standard for  
856 de-identification before being shared with any individuals or organizations that are not  
857 listed as study staff on this protocol.

858  
859 **SENDING SPECIMENS/DATA TO RESEARCH COLLABORATORS OUTSIDE**  
860 **PARTNERS**

861 Specimens or data collected by Partners investigators will be sent to research collaborators  
862 outside Partners, indicate to whom specimens/data will be sent, what information will be sent,  
863 and whether the specimens/data will contain identifiers that could be used by the outside  
864 collaborators to link the specimens/data to individual subjects.

865 The relevant de-identified data outlined above (versions of paper self-report measures  
866 and outcomes from medical records and scheduling systems) will be saved in Partners  
867 secure file store. All paper records of consent will be housed in a locked file cabinet  
868 within the office of the Brigham PI, Dr. David K. Ahern, located at 1249 Boylston Street,  
869 3rd Floor, Boston MA 02215. Digitized versions will be sent directly from the South  
870 Huntington or Brookline Clinics to Cogito Corporation (7 Water Street, Boston, MA  
871 02109) for specialized data analysis. Data will be delivered to Cogito using an encrypted  
872 USB drive or the Send Secure feature. If shared via USB, the key necessary to decrypt  
873 this information will be sent to Cogito using Partner's 'Send Secure' encrypted email  
874 feature, meaning the information required to decrypt the USB drive will not be stored on  
875 the drive itself.

876  
877 Specifically address whether specimens/data will be stored at collaborating sites outside  
878 Partners for future use not described in the protocol. Include whether subjects can withdraw

879 their specimens/data, and how they would do so. When appropriate, submit documentation of  
880 IRB approval from the recipient institution.

881  
882 Research records will be kept indefinitely after the study is closed. Approved study staff  
883 may use research records for future studies.

884 The results of the study may be published for scientific purposes, but participant identity  
885 will never be revealed unless required by law.

886 Data may be shared with other research organizations or government agencies for  
887 scientific purposes, but participant identity will never be revealed unless required by law.

888 Research records and the information within them will not be used for any purpose  
889 other than that which is described in the protocol.

890  
891 **RECEIVING SPECIMENS/DATA FROM RESEARCH COLLABORATORS OUTSIDE**  
892 **PARTNERS**

893 When specimens or data collected by research collaborators outside Partners will be sent to  
894 Partners investigators, indicate from where the specimens/data will be obtained and whether the  
895 specimens/data will contain identifiers that could be used by Partners investigators to link the  
896 specimens/data to individual subjects. When appropriate, submit documentation of IRB  
897 approval and a copy of the IRB-approved consent form from the institution where the  
898 specimens/data were collected.

899  
900 All data gathered on the phone, including passive sensor data, audio diaries and usage  
901 logs will be securely transferred to Cogito in an encrypted format. Once the data is  
902 successfully transferred, it will be deleted automatically off of the phone. Both the  
903 transfer and deletion of data occur automatically without the need for any user  
904 intervention.

905 The data will be transferred to Cogito controlled servers, either in the cloud or at Cogito  
906 HQ. All servers utilize full disk encryption, to allow for maximum data security. Data  
907 access will be limited to Cogito and BWH study personnel who are listed on this  
908 protocol. All research efforts will take place within the Cogito computing environment or  
909 within Partners; identifiable participant data will not be shared or taken off of Cogito  
910 servers.

911 From this point, these low level data will be fed into Cogito's machine learning  
912 algorithms and transformed into behavioral data. These data will be displayed to  
913 clinicians at the South Huntington and Brookline Clinics via the "Clinician Dashboard".  
914 Access to this dashboard is restricted to the clinical staff at the South Huntington and  
915 Brookline Clinics. Each staff member will have a unique username and password to  
916 allow for auditing of logins and usage. Participants in the study will also be able to see  
917 feedback based on their behavioral data over time via the Cogito mobile app. Both the  
918 patient facing mobile application and the clinician facing dashboard have the added  
919 benefit of not storing any data from the Cogito servers. Both sides of the software are

920 merely 'viewers' of the feedback data on Cogito servers and do not permanently store  
921 these data. This feedback does not provide advice and is not an intervention. This  
922 information is purely supplemental to the care participants receive from their behavioral  
923 healthcare provider.  
924
