# Supplementary material for: Effect of a Mobile Monitoring System vs Usual Care on Depression Symptoms and Psychological Health: A Randomized Clinical Trial
Source: PubMed Central journal article supplement — JAMA Netw Open. 2020 Jan 17;3(1):e1919403. doi: 10.1001/jamanetworkopen.2019.19403 (PMC6991269; doi:10.1001/jamanetworkopen.2019.19403), 2020-01-17
Supplement: jamanetwopen-3-e1919403-s003.pdf [file jamanetwopen-3-e1919403-s003.pdf]

## Data Sharing Statement

Place. Effect of a Mobile Monitoring System vs Usual Care on Depression Symptoms and Psychological Health. *JAMA Netw Open*. Published January 17, 2020. 10.1001/jamanetworkopen.2019.19403

### Data

**Data available:** Yes

**Data types:** Deidentified participant data, Data dictionary

**How to access data:** [victoria@companionmx.com](mailto:victoria@companionmx.com)

**When available:** With publication

### Supporting Documents

**Document types:** None

### Additional Information

**Who can access the data:** researchers whose proposed use of the data has been approved

**Types of analyses:** for any purpose

**Mechanisms of data availability:** after approval of a proposal and a signed data access agreement
